# Supplementary material for: Reaction mechanism for the highly efficient catalytic decomposition of peroxynitrite by the amphipolar iron(iii) corrole1-Fe
Source: Royal Society of Chemistry journal article supplement (doi:10.1039/c5dt00086f), 2015-01-01
Supplement: c5dt00086f1.pdf [file c5dt00086f1.pdf]

# Reaction mechanism of the highly efficient catalytic decomposition of peroxyxynitrite by the amphipolar iron(III) corrole 1-Fe.

Shlomit Avidan-Shlomovich and Zeev Gross\*

Schulich Faculty of Chemistry, Technion - Israel Institute of Technology, Haifa 3200008, Israel.

## Supporting Information

### Content:

|                                             |   |
|---------------------------------------------|---|
| 1. Kinetic measurements: .....              | 2 |
| 2. Fluorescein nitration experiments: ..... | 5 |

## 1. Kinetic measurements:

### $k_{\text{cat}}$ values of the 1-Fe catalyzed decomposition of PN:

| [1-Fe]<br>M | $k_{\text{obs}}$ (s <sup>-1</sup> ) | rate (M <sup>-1</sup> s <sup>-1</sup> ) | R <sup>2</sup> | error    |
|-------------|-------------------------------------|-----------------------------------------|----------------|----------|
| 2.5E-06     | 3.967                               | 2.03E+06                                | 0.9871         | 1.41E+05 |
| 5.0E-06     | 11.32                               |                                         |                |          |
| 7.5E-06     | 14.36                               |                                         |                |          |
| 1.0E-05     | 21.21                               |                                         |                |          |
| 1.3E-05     | 26.04                               |                                         |                |          |
| 1.5E-05     | 29.31                               |                                         |                |          |
| 0.0E+00     | 0.34                                |                                         |                |          |

**Table S1.** Observed rate constants for decomposition of peroxyxynitrite (385  $\mu\text{M}$ , 0.15 M phosphate buffer, pH 7.4, 25 °C) as a function of the concentration of 1-Fe.

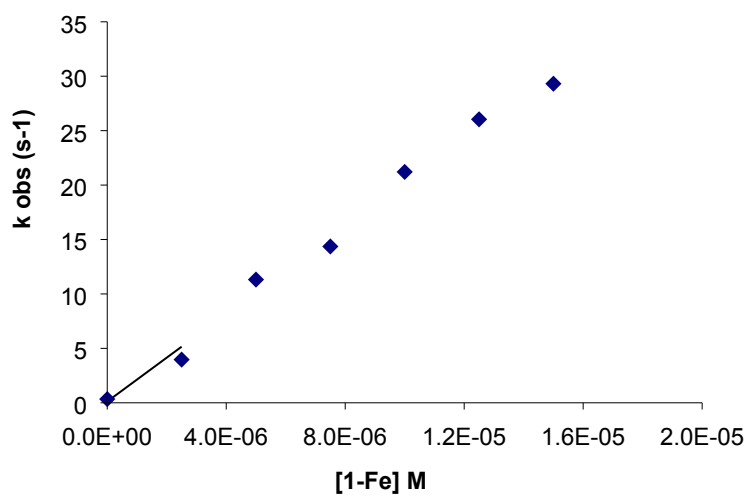

**Figure S1.** Plot of the observed rate constants for decomposition of peroxyxynitrite (385  $\mu\text{M}$ , 0.15 M phosphate buffer, pH 7.4, 25 °C) as a function of the concentration of **1-Fe**.

**Eyring plot (Fig. 1):**

| Temp.<br>K | [1-Fe] M | $k_{obs}$ | rate    | R <sup>2</sup> | error   | 1/T x<br>10 <sup>3</sup> | lnk obs | ln(k/t) | error  |
|------------|----------|-----------|---------|----------------|---------|--------------------------|---------|---------|--------|
| 310        | 2.50E-6  | 5.692     | 5.16E+6 | 0.9843         | 3.76E+5 | 3.2258                   | 15.4555 | 9.7189  | 0.0729 |
|            | 5.00E-6  | 17.19     |         |                |         |                          |         |         |        |
|            | 7.50E-6  | 28.72     |         |                |         |                          |         |         |        |
|            | 1.00E-5  | 39.41     |         |                |         |                          |         |         |        |
|            | 1.25E-5  | 59.03     |         |                |         |                          |         |         |        |
| 304        | 2.50E-6  | 5.939     | 3.38E+6 | 0.9919         | 1.53E+5 | 3.2895                   | 15.0334 | 9.3164  | 0.0453 |
|            | 5.00E-6  | 16.98     |         |                |         |                          |         |         |        |
|            | 7.50E-6  | 24.23     |         |                |         |                          |         |         |        |
|            | 1.00E-5  | 35.16     |         |                |         |                          |         |         |        |
|            | 1.25E-5  | 40.38     |         |                |         |                          |         |         |        |
| 298        | 2.50E-6  | 3.967     | 2.03E+6 | 0.9871         | 1.41E+5 | 3.3557                   | 14.5087 | 8.8116  | 0.0704 |
|            | 5.00E-6  | 11.32     |         |                |         |                          |         |         |        |
|            | 7.50E-6  | 14.36     |         |                |         |                          |         |         |        |
|            | 1.00E-5  | 21.21     |         |                |         |                          |         |         |        |
|            | 1.25E-5  | 26.04     |         |                |         |                          |         |         |        |
| 288        | 2.50E-6  | 3.131     | 1.25E+6 | 0.9762         | 9.78E+4 | 3.4722                   | 14.0387 | 8.3757  | 0.0782 |
|            | 5.00E-6  | 7.276     |         |                |         |                          |         |         |        |
|            | 7.50E-6  | 10.53     |         |                |         |                          |         |         |        |
|            | 1.00E-5  | 13.41     |         |                |         |                          |         |         |        |
|            | 1.25E-5  | 17.69     |         |                |         |                          |         |         |        |
| 278        | 2.50E-6  | 0.7402    | 7.08E+5 | 0.9915         | 3.28E+4 | 3.5971                   | 13.4698 | 7.8421  | 0.0463 |
|            | 5.00E-6  | 3.179     |         |                |         |                          |         |         |        |
|            | 7.50E-6  | 5.026     |         |                |         |                          |         |         |        |
|            | 1.00E-5  | 6.619     |         |                |         |                          |         |         |        |
|            | 1.25E-5  | 7.921     |         |                |         |                          |         |         |        |
|            | 1.50E-5  | 9.961     |         |                |         |                          |         |         |        |

**Table S2.** Observed rate constants for decomposition of peroxyxynitrite (385  $\mu$ M, 0.15 M phosphate buffer, pH 7.4) as a function of the concentration of **1-Fe**.

**The effect of ascorbate on the non-catalyzed and 1-Fe catalyzed decomposition of PN (Fig. 5):**

| [ascorbate]<br>μM | [1-Fe] M | k <sub>obs</sub> (s <sup>-1</sup> ) | k <sub>cat</sub> (M <sup>-1</sup> s <sup>-1</sup> ) | R <sup>2</sup> | error    |
|-------------------|----------|-------------------------------------|-----------------------------------------------------|----------------|----------|
| 0                 | 2.50E-06 | 1.69                                | 1.56E+06x - 2.304                                   | 0.9991         | 2.72E+04 |
|                   | 5.00E-06 | 5.315                               |                                                     |                |          |
|                   | 7.50E-06 | 9.43                                |                                                     |                |          |
|                   | 1.00E-05 | 13.6                                |                                                     |                |          |
|                   | 1.25E-05 | 17.1                                |                                                     |                |          |
| 400               | 2.50E-06 | 20.55                               | 6.63E+06x + 5.415                                   | 0.9915         | 3.55E+05 |
|                   | 5.00E-06 | 38.02                               |                                                     |                |          |
|                   | 7.50E-06 | 59.46                               |                                                     |                |          |
|                   | 1.00E-05 | 70.55                               |                                                     |                |          |
|                   | 1.25E-05 | 87.18                               |                                                     |                |          |
| 1000              | 5.00E-06 | 62.5                                | 9.62E+07x+11.663                                    | 0.9902         | 6.76E+05 |
|                   | 7.50E-06 | 81.05                               |                                                     |                |          |
|                   | 1.00E-05 | 105.37                              |                                                     |                |          |
|                   | 1.25E-05 | 134.6                               |                                                     |                |          |

**Table S3.** Observed rate constants for decomposition of peroxynitrite (385 μM, 0.15 M phosphate buffer, pH 7.4, 25 °C) as a function of the concentration of **1-Fe** with 0, 400 or 1000 μM ascorbate.

## 2. Fluorescein nitration experiments:

### Influence of peroxyxynitrite concentration on the yield of fluorescein nitration (Fig. 6):

|        | [PN] $\mu$ M | Area carboxyfluorescein | Area Fluorescein | Area nitrofluorescein | %nitro |
|--------|--------------|-------------------------|------------------|-----------------------|--------|
| no cat | 100          | 8749008                 | 5559760.62       | 773317.886            | 8.84   |
|        | 200          | 7181910                 | 5064414.66       | 1294479.78            | 18.02  |
|        | 400          | 6816112                 | 3423481.56       | 2521530.37            | 36.99  |
|        | 600          | 6532926                 | 2430013.74       | 3379061.31            | 51.72  |
|        | 800          | 6935329                 | 1997458.98       | 4305399.67            | 62.08  |
|        | 1000         | 6482432                 | 1627612.2        | 4267354.85            | 65.83  |
| 1-Fe   | 100          | 8599268                 | 4935095.34       | 1570074.44            | 18.26  |
|        | 200          | 10364334                | 4118077.86       | 4835288.06            | 46.65  |
|        | 400          | 9517411                 | 1860760.44       | 6980809.09            | 73.35  |
|        | 600          | 9445846                 | 1378727.4        | 7542888.72            | 79.85  |
|        | 800          | 9118524                 | 1055327.64       | 7682493.57            | 84.25  |
|        | 1000         | 8758016                 | 586332.78        | 7943327.39            | 90.70  |
| 1-Mn   | 200          | 7955917                 | 8668670.58       | 52918.624             | 0.67   |
|        | 400          | 7800880                 | 8391335.94       | 179608.396            | 2.30   |
|        | 600          | 8029129                 | 8331814.26       | 241809.678            | 3.01   |
|        | 800          | 7793879                 | 7871066.16       | 385146.014            | 4.94   |
|        | 1000         | 7360348                 | 7166397.96       | 403978.982            | 5.49   |

**Table S4.** % Nitrofluoresceine with increasing concentration of peroxyxynitrite. Reaction conditions: 1  $\mu$ M catalyst (1-Fe or 1-Mn), 100  $\mu$ M fluorescein in 0.2 M phosphate buffer at pH=7.4.

**Effect of ascorbate on the nitration yield of fluorescein (Fig. 7):**

| no cat            |                            |                  |                          |         |
|-------------------|----------------------------|------------------|--------------------------|---------|
| [ascorbate]<br>μM | Area<br>carboxyfluorescein | Area fluorescein | Area<br>nitrofluorescein | % nitro |
| 0                 | 7856586                    | 2916716.22       | 4173400.308              | 53.12   |
| 250               | 7262008                    | 6209776.08       | 990381.92                | 13.64   |
| 500               | 7311816                    | 6824460.66       | 0                        | 0.00    |
| 1000              | 7684401                    | 7498548.36       | 0                        | 0.00    |

| 1-Fe              |                            |                  |                          |         |
|-------------------|----------------------------|------------------|--------------------------|---------|
| [ascorbate]<br>μM | Area<br>carboxyfluorescein | Area fluorescein | Area<br>nitrofluorescein | % nitro |
| 0                 | 7947274                    | 125708.94        | 7508307.73               | 94.48   |
| 250               | 8240689                    | 3898267.62       | 4298080.952              | 52.16   |
| 500               | 7485758                    | 6513475.5        | 1051039.858              | 14.04   |
| 1000              | 7463588                    | 7557152.34       | 136721.508               | 1.83    |

**Table S5.** % Nitrofluorescein with different concentrations of ascorbate. Reaction conditions: 1 μM **1-Fe**, 100 μM fluorescein, 1000 μM peroxyxynitrite in 0.2 M phosphate buffer at pH=7.4.

**Effect of various catalysts on the nitration yield of fluorescein by peroxyxynitrite in solutions without and with ascorbate (Fig. 8):**

|         | ascorbate<br>$\mu\text{M}$ | Area<br>carboxyfluorescein | Area<br>fluorescein | Are<br>nitrofluorescein | % nitro |
|---------|----------------------------|----------------------------|---------------------|-------------------------|---------|
| no cat  | 0                          | 8097052                    | 3603941.28          | 4318966.5               | 53.3    |
|         | 250                        | 8041416                    | 4376302.68          | 1880081.5               | 23.38   |
| 1-Mn    | 0                          | 7272660                    | 6350798.64          | 665447.178              | 9.15    |
|         | 250                        | 7643381                    | 7122519.36          | 419622.72               | 5.49    |
| 1-Fe    | 0                          | 8117492                    | 2595799.38          | 6443866.15              | 79.385  |
|         | 250                        | 7889365                    | 3330376.62          | 4007007.66              | 50.79   |
| 1-Ga    | 0                          | 7743235                    | 4271838.78          | 2620309.6               | 33.84   |
|         | 250                        | 8101925                    | 5002452.24          | 2243420.83              | 27.69   |
| Fe-pOMe | 0                          | 7994016                    | 2472221.1           | 4340750.59              | 54.3    |
|         | 250                        | 7465488                    | 2819874.36          | 3596123.61              | 48.17   |
| Mn-pOMe | 0                          | 7970952                    | 7226778.06          | 470287.158              | 5.9     |
|         | 250                        | 8085018                    | 7809421.8           | 201316.016              | 2.49    |
| FeTSP   | 0                          | 7312658                    | 86144.1             | 7195653.7               | 98.4    |
|         | 250                        | 7283599                    | 100136.46           | 7150309.28              | 98.17   |
| MnTMpyP | 0                          | 8807148                    | 701526.36           | 6489778.9               | 73.69   |
|         | 250                        | 8766241                    | 1375470.42          | 5937496.38              | 67.73   |

**Table S6.** % Nitrofluorescein in solution with different catalysts (1  $\mu\text{M}$ ) on the nitration yield of fluorescein (100  $\mu\text{M}$ ) by peroxyxynitrite (1000  $\mu\text{M}$ ) in solutions without or with ascorbate (250  $\mu\text{M}$ ), in 0.2 M phosphate buffer, pH=7.4.
